# Supplementary material
Source: HighWire-hosted journal article supplement (https://www.cmaj.ca/highwire/filestream/58495/field_highwire_adjunct_files/0/cvb-akhdari-online_appendix.pdf)
Supplement: cvb-akhdari-online_appendix.pdf [file cvb-akhdari-online_appendix.pdf]

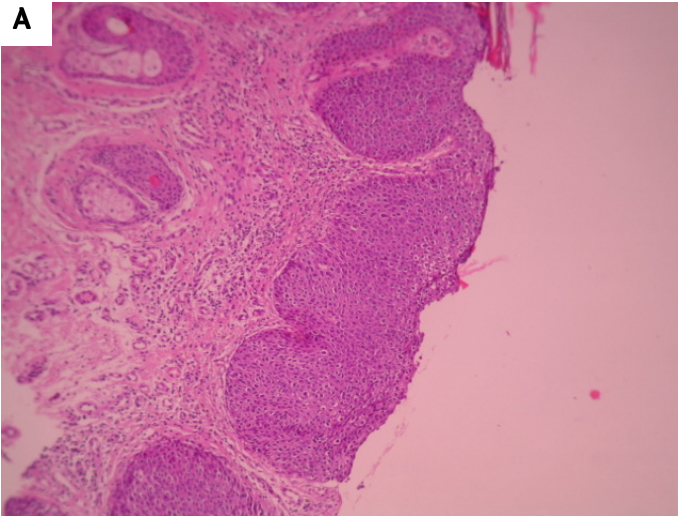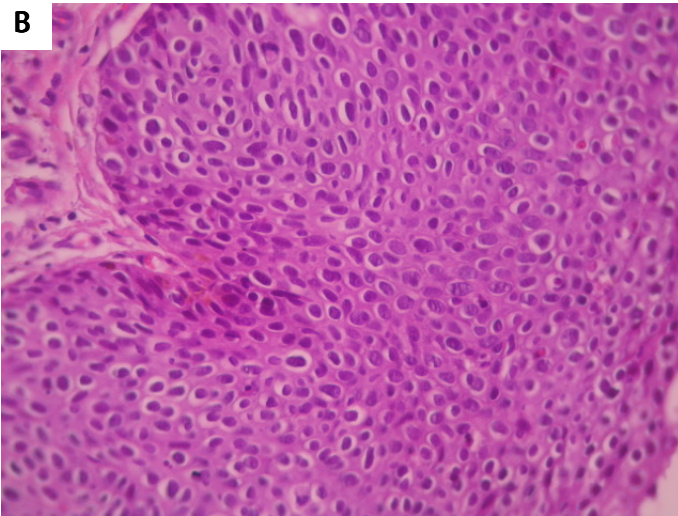

Histopathology images, showing changes consistent with squamous-cell carcinoma in situ, or Bowen disease, with no dermal invasion in 70-year-old otherwise healthy man who presented with a 1-year history of 2 gradually enlarging asymptomatic lesions over his right thigh. [For details about the case, see Akhdari et al. Bowen disease. *CMAJ* 2006;175(7):739, available online at [www.cmaj.ca/cgi/content/full/175/7/739/DC](http://www.cmaj.ca/cgi/content/full/175/7/739/DC)]
